# Supplementary material for: "Star" Turn- Carew orders after Re W ans B; Re W
Source: MDPI journal article supplement (doi:10.3390/ijms241411297), 2001-01-01
Supplement: s1 [file s1]

**Supplementary Table S1.** Clinico-pathological characteristics of the cohort of 96 triple-negative breast cancer (TNBC) patients by type of response to neoadjuvant chemotherapy (NAC).

|                                                    | Partial responders<br>(n=63) | Non-responders<br>(n=33) | <i>p</i>                     |
|----------------------------------------------------|------------------------------|--------------------------|------------------------------|
| Age Years, median (IQR)                            | 51.00 (25.00)                | 55.00 (25.00)            | 0.452*                       |
| <b>Menopausal status</b>                           |                              |                          |                              |
| Pre-menopausal                                     | 24 (47.1%)                   | 11 (40.7%)               | 0.768 <sup>†</sup>           |
| Menopausal                                         | 27 (52.9%)                   | 16 (59.3%)               |                              |
| <b>Histological grade</b>                          |                              |                          |                              |
| < 3                                                | 10 (16.7%)                   | 7 (21.9%)                | 0.741 <sup>†</sup>           |
| 3                                                  | 50 (83.3%)                   | 25 (78.1%)               |                              |
| <b>Tumour diameter</b>                             |                              |                          |                              |
| mm, median (IQR)                                   | 22.00 (21.00)                | 30.00 (35.00)            | <b>0.003*</b>                |
| <b>Nodal status</b>                                |                              |                          |                              |
| Negative                                           | 37 (60.7%)                   | 4 (12.1%)                | <b>&lt;0.001<sup>†</sup></b> |
| Positive                                           | 24 (39.3%)                   | 29 (87.9%)               |                              |
| <b>Ki67 degree</b>                                 |                              |                          |                              |
| ≤ 30%                                              | 14 (25.9%)                   | 10 (31.3%)               | 0.777 <sup>†</sup>           |
| > 30%                                              | 40 (74.1%)                   | 22 (68.8%)               |                              |
| <b>Surgery</b>                                     |                              |                          |                              |
| Tumorectomy                                        | 26 (42.6%)                   | 10 (30.3%)               | 0.342 <sup>†</sup>           |
| Mastectomy                                         | 35 (57.4%)                   | 23 (69.7%)               |                              |
| No lymphadenectomy                                 | 17 (27.9%)                   | 3 (9.1%)                 | 0.063 <sup>†</sup>           |
| Lymphadenectomy                                    | 44 (72.1%)                   | 30 (90.9%)               |                              |
| <b>Adjuvant treatment</b>                          |                              |                          |                              |
| No                                                 | 51 (83.6%)                   | 26 (81.3%)               | 1.000 <sup>†</sup>           |
| Yes                                                | 10 (16.4%)                   | 6 (18.8%)                |                              |
| <b>Radiotherapy</b>                                |                              |                          |                              |
| No                                                 | 4 (4.6%)                     | 0 (0.0%)                 | 0.295 <sup>†</sup>           |
| Yes                                                | 54 (93.1%)                   | 30 (100.0%)              |                              |
| <b>Relapse</b>                                     |                              |                          |                              |
| No                                                 | 40 (63.5%)                   | 14 (43.8%)               | 0.106 <sup>†</sup>           |
| Yes                                                | 23 (36.5%)                   | 18 (56.3%)               |                              |
| <b>Overall survival</b> (median months (IQR))      | 59.80 (34.93)                | 38.37 (36.17)            | <b>0.026*</b>                |
| <b>Relapse-free survival</b> (median months (IQR)) | 45.47 (45.80)                | 29.53 (40.13)            | 0.056*                       |
| <b>Status</b>                                      |                              |                          |                              |
| Alive                                              | 42 (66.7%)                   | 17 (51.5%)               | 0.219 <sup>†</sup>           |
| Dead                                               | 21 (33.3%)                   | 16 (48.5%)               |                              |

Data are presented as the median and interquartile range (Mann–Whitney U test, \*), and the number and percentage of patients in each category (chi-squared test, <sup>†</sup>). Age, menopausal status, histological grade, tumour diameter, nodal status, and Ki67 degree were recorded at the time of diagnosis. Overall survival and relapse-free survival were censored at 60 months.
